# Supplementary material
Source: PubMed Central journal article supplement (PMC6648282)
Supplement: ao9b00790_si_001.pdf [file ao9b00790_si_001.pdf]

## Supporting Information

# Green and efficient esterification method using dried Dowex H<sup>+</sup>/NaI approach

Petri A. Turhanen\*, Jukka Leppänen and Jouko J. Vepsäläinen

*University of Eastern Finland, School of Pharmacy, Biocenter Kuopio, P.O. Box 1627, FIN-70211, Kuopio, Finland. E-mail: petri.turhanen@uef.fi*

### Table of Contents

|                                                                                |             |
|--------------------------------------------------------------------------------|-------------|
| <b><sup>1</sup>H and <sup>13</sup>C NMR spectra of compound 23</b>             | <b>S2</b>   |
| <b><sup>1</sup>H and <sup>13</sup>C NMR spectra of compound 39</b>             | <b>S3</b>   |
| <b><sup>1</sup>H and <sup>13</sup>C NMR spectra of compound 42</b>             | <b>S4</b>   |
| <b><sup>1</sup>H and <sup>13</sup>C NMR spectra of compound 47</b>             | <b>S5</b>   |
| <b><sup>1</sup>H NMR spectra of resin acids (50) separation</b>                | <b>S6-7</b> |
| <b><sup>1</sup>H NMR spectra of other isolated compounds, starting from 22</b> | <b>S8</b>   |

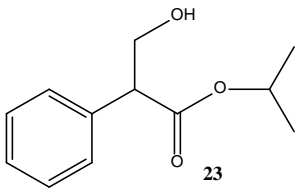

1H\_quick CDCl3 {C:\NMRData} nmr {1 E7 - 153}

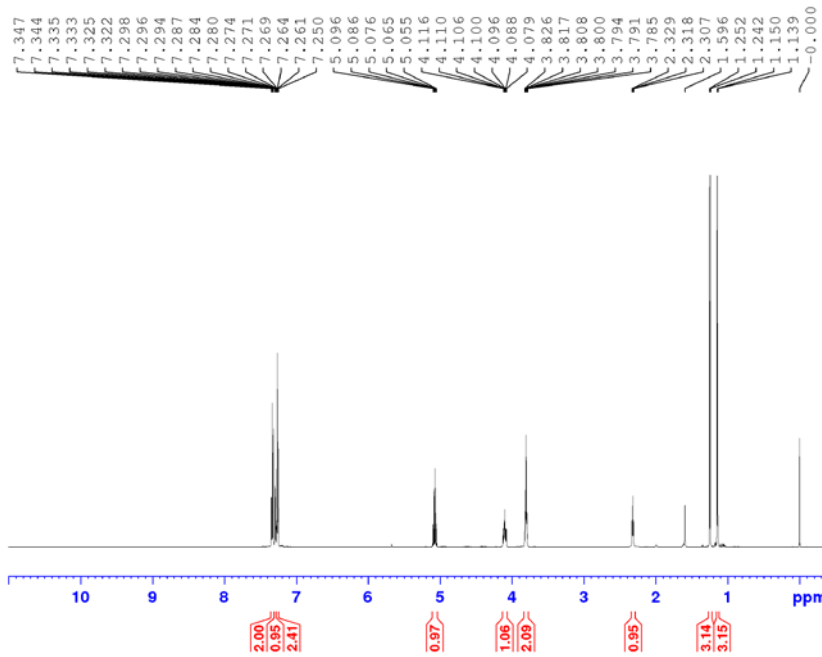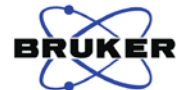

Current Data Parameters  
 NAME PTMS-150118-3 rf. 0.86  
 EXPNO 10  
 PROCNO 1

F2 - Acquisition Parameters  
 Date\_ 20180118  
 Time 17.28 h  
 INSTRUM spect  
 PROBHD Z156457\_0001 (4  
 PULPROG zgpg30  
 TD 65536  
 SOLVENT CDCl3  
 NS 16  
 DS 2  
 SWH 12019.230 Hz  
 FIDRES 0.366798 Hz  
 AQ 2.7262976 sec  
 RG 69.21  
 SW 41.600 usec  
 DE 18.00 usec  
 TE 298.1 K  
 D1 1.00000000 sec  
 TDO 1  
 SFO1 600.1837061 MHz  
 NUC1 1H  
 P1 12.00 usec  
 PLW1 21.23600006 W

F2 - Processing parameters  
 SI 524288  
 SF 600.1800144 MHz  
 WDW EM  
 SSB 0  
 LB 0.30 Hz  
 GB 0  
 FC 1.00

13C\_quick CDCl3 {C:\NMRData} nmr {1 E7 - 153}

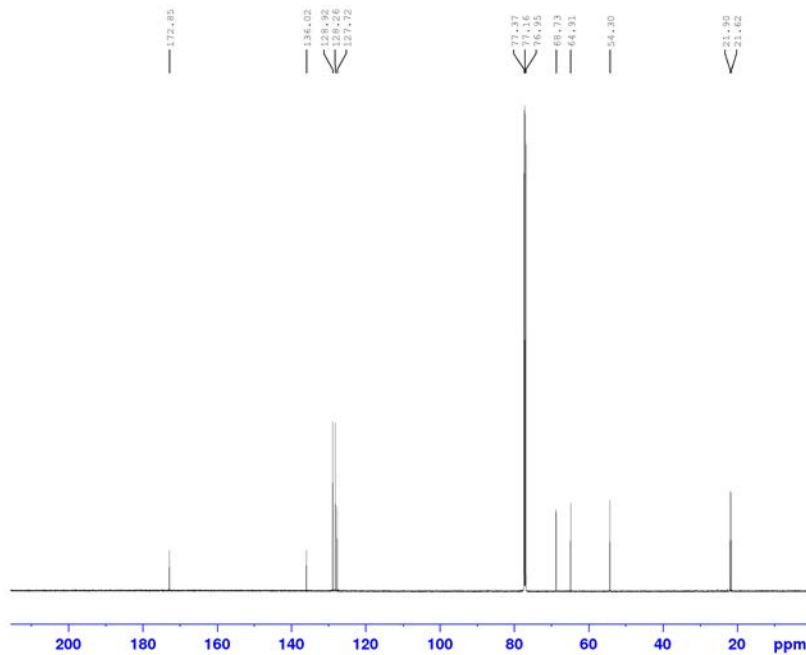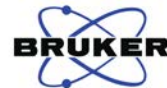

Current Data Parameters  
 NAME PTMS-150118-3 rf. 0.86  
 EXPNO 11  
 PROCNO 1

F2 - Acquisition Parameters  
 Date\_ 20180118  
 Time 17.51 h  
 INSTRUM spect  
 PROBHD Z156457\_0001 (4  
 PULPROG zgpg30  
 TD 65536  
 SOLVENT CDCl3  
 NS 256  
 DS 4  
 SWH 36231.883 Hz  
 FIDRES 1.105709 Hz  
 AQ 0.9043969 sec  
 RG 200.58  
 SW 13.800 usec  
 DE 18.00 usec  
 TE 298.1 K  
 D1 4.00000000 sec  
 D11 0.03000000 sec  
 TDO -1  
 SFO1 150.9304724 MHz  
 NUC1 13C  
 P1 10.00 usec  
 PLW1 93.40000153 W  
 SFO2 600.1824007 MHz  
 NUC2 1H  
 CPDPRG2 waltz16  
 FCFD2 80.00 usec  
 PLW2 21.23600006 W  
 PLW12 0.48938000 W  
 PLW13 0.24527000 W

F2 - Processing parameters  
 SI 524288  
 SF 150.9153622 MHz  
 WDW EM  
 SSB 0  
 LB 1.00 Hz  
 GB 0  
 FC 1.40

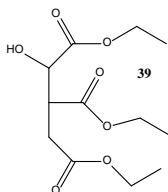

1H\_quick CDCl3 {C:\NMRData} nmr {4 A6 - 441}

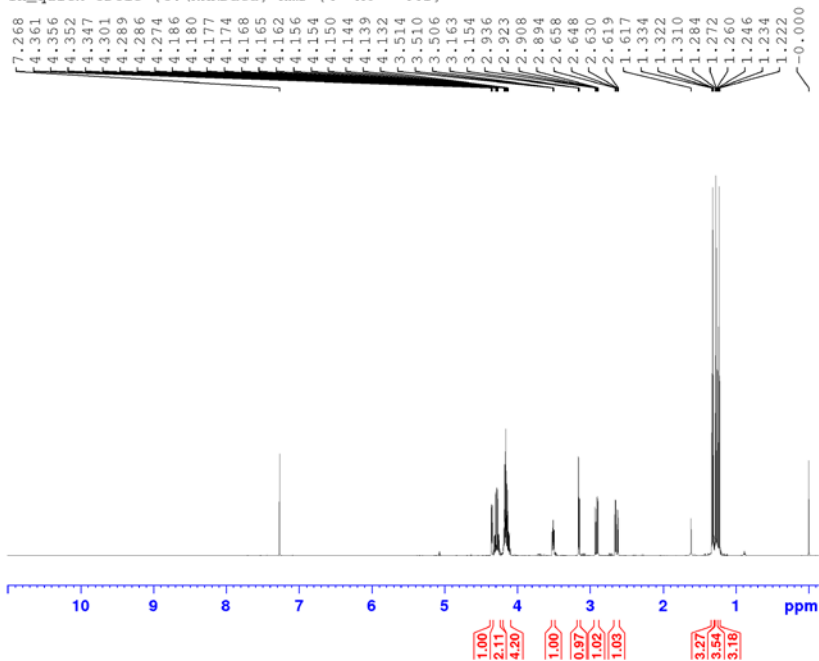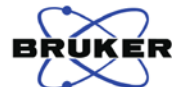

Current Data Parameters  
 NAME PTMS-180117-2  
 EXPNO 10  
 PROCNO 1

F2 - Acquisition Parameters  
 Date\_ 20170224  
 Time 10.58 h  
 INSTRUM spect  
 PROBHD 2156457\_0001 ( )  
 PULPROG zgpg30  
 TD 65536  
 SOLVENT CDCl3  
 NS 16  
 DS 2  
 SWH 12019.230 Hz  
 FIDRES 0.366798 Hz  
 AQ 2.7262976 sec  
 RG 51.76  
 DW 41.600 usec  
 DE 18.00 usec  
 TE 298.1 K  
 D1 1.0000000 sec  
 ID0 1  
 SF01 600.1837061 MHz  
 NUC1 1H  
 P1 12.00 usec  
 PLW1 21.23600006 W

F2 - Processing parameters  
 SI 524288  
 SF 600.1800090 MHz  
 MDW EM  
 SSB 0  
 LB 0.30 Hz  
 GB 0  
 PC 1.00

13C\_quick CDCl3 {C:\NMRData} nmr {1 A6 - 141}

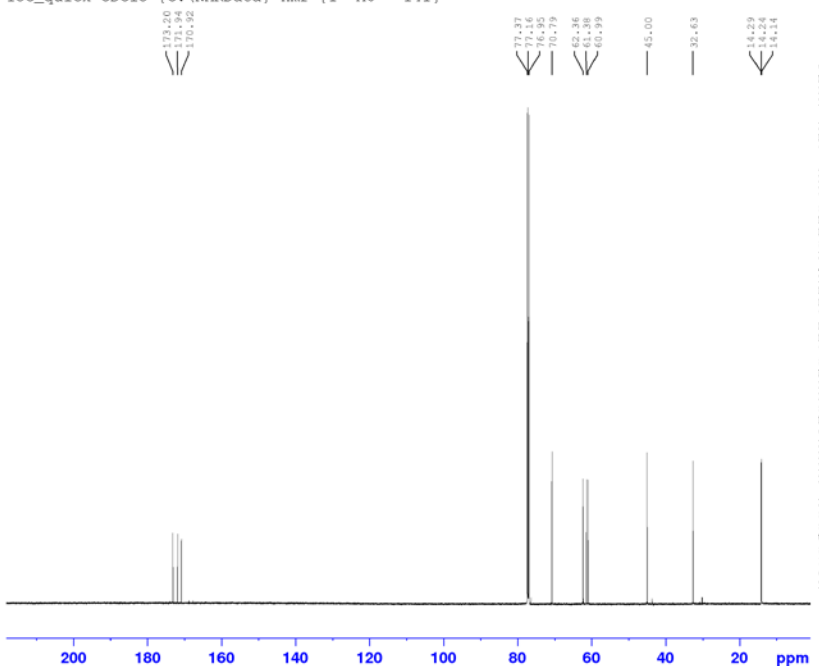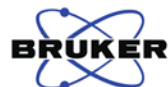

Current Data Parameters  
 NAME PTMS-180117-2  
 EXPNO 21  
 PROCNO 1

F2 - Acquisition Parameters  
 Date\_ 20171031  
 Time 15.08 h  
 INSTRUM spect  
 PROBHD 2156457\_0001 ( )  
 PULPROG zgpg30  
 TD 65536  
 SOLVENT CDCl3  
 NS 256  
 DS 4  
 SWH 36231.883 Hz  
 FIDRES 1.105709 Hz  
 AQ 0.9043968 sec  
 RG 200.58  
 DW 13.800 usec  
 DE 18.00 usec  
 TE 298.1 K  
 D1 2.0000000 sec  
 D11 0.0300000 sec  
 ID0 1  
 SF01 150.9304726 MHz  
 NUC1 13C  
 P1 10.00 usec  
 PLW1 83.40000153 W  
 SEQ2 600.1824007 MHz  
 NUC2 1H  
 CPDPRG[2] waltz16  
 PCPD2 80.00 usec  
 PLW2 21.23600006 W  
 PLM2 0.48938000 W  
 PLM3 0.24527000 W

F2 - Processing parameters  
 SI 524288  
 SF 150.9153618 MHz  
 MDW EM  
 SSB 0  
 LB 1.00 Hz  
 GB 0  
 PC 1.40

42

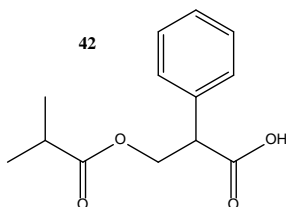

1H\_quick CDC13 {C:\NMRData} nmr {1 D10 - 176}

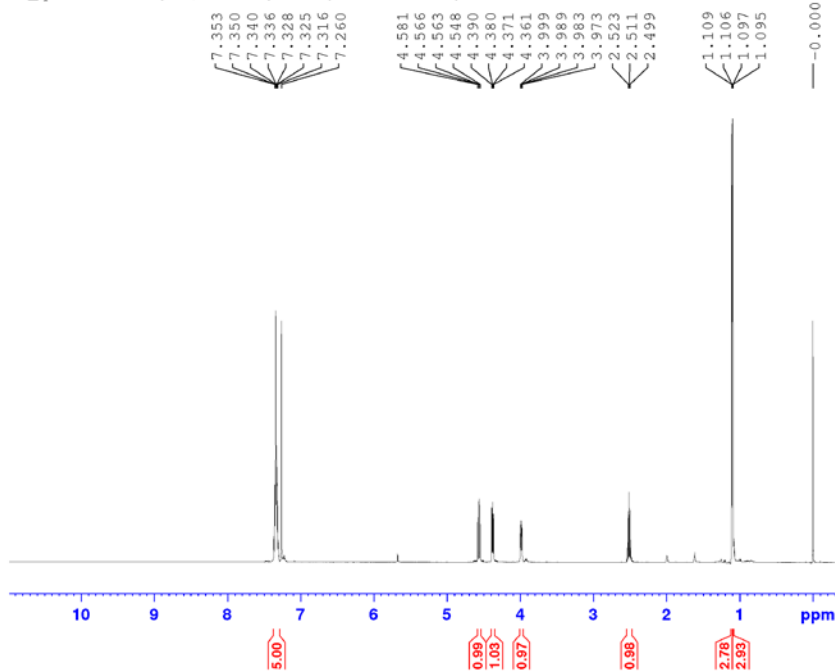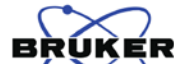

Current Data Parameters  
NAME FIMS-220118-1 rf. 0.67  
EXPNO 10  
PROCNO 1

F2 - Acquisition Parameters  
Date\_ 20180125  
Time 11.52 h  
INSTRUM spect  
PROBHD Z156457\_0001 f  
PULPROG zg30  
TD 65536  
SOLVENT CDC13  
NS 16  
DS 2  
SNH 12019.230 Hz  
FIDRES 0.366798 Hz  
AQ 2.7262976 sec  
RG 80.09  
DN 41.600 usec  
DE 18.00 usec  
TE 298.1 K  
D1 1.00000000 sec  
TDO 1  
SFO1 600.1837061 MHz  
NUC1 1H  
P1 12.00 usec  
PLW1 21.23600006 W

F2 - Processing parameters  
SI 524288  
SF 600.1800141 MHz  
WDW EM  
SSB 0  
LB 0.30 Hz  
GB 0  
PC 1.00

13C\_quick CDC13 {C:\NMRData} nmr {1 D10 - 176}

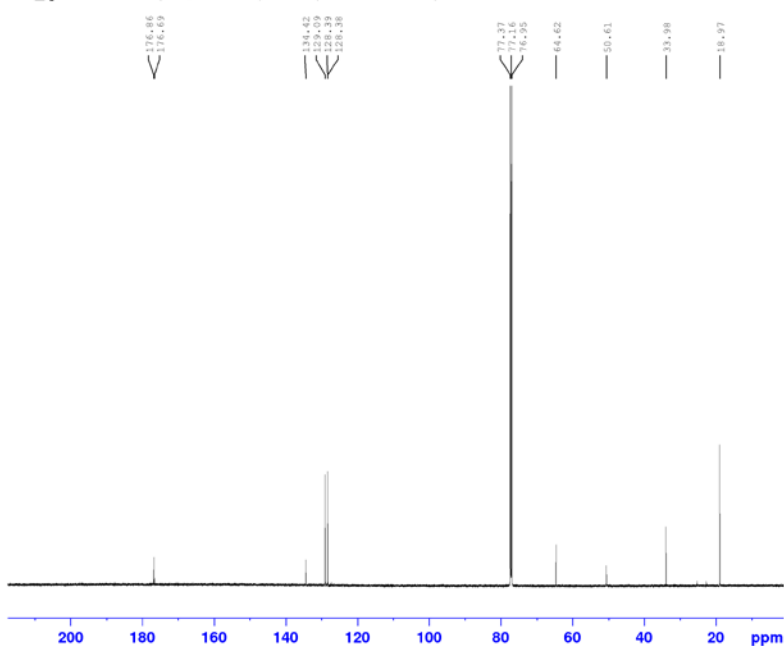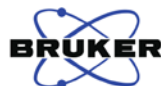

Current Data Parameters  
NAME FIMS-220118-1 rf. 0.67  
EXPNO 11  
PROCNO 1

F2 - Acquisition Parameters  
Date\_ 20180125  
Time 12.07 h  
INSTRUM spect  
PROBHD Z156457\_0001 f  
PULPROG zgpg30  
TD 65536  
SOLVENT CDC13  
NS 256  
DS 4  
SNH 36231.888 Hz  
FIDRES 1.105709 Hz  
AQ 0.9043968 sec  
RG 200.58  
DN 13.800 usec  
DE 18.00 usec  
TE 298.1 K  
D1 2.00000000 sec  
D11 0.03000000 sec  
TDO 1  
SFO1 150.9304726 MHz  
NUC1 13C  
P1 10.00 usec  
PLW1 83.40000153 W  
SFO2 600.1824007 MHz  
NUC2 1H  
CPDPRG[2] waltz16  
PCPD2 80.00 usec  
PLW2 21.23600006 W  
PLW12 8.48928000 W  
PLW13 0.24527000 W

F2 - Processing parameters  
SI 524288  
SF 150.9153611 MHz  
WDW EM  
SSB 0  
LB 1.00 Hz  
GB 0  
PC 1.40

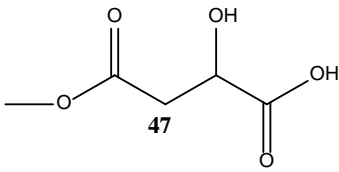

1H\_quick MeOD (C:\NMRData) Petri {1 D4 - 128}

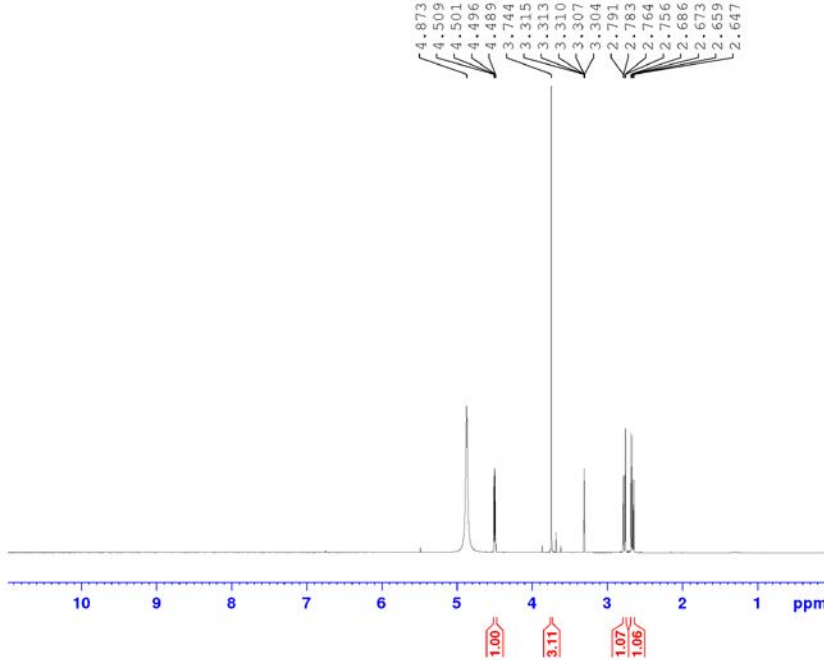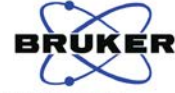

Current Data Parameters  
 NAME F2MS-031018-1 fr. 5-10 akkha  
 EXPNO 1  
 PROCNO 1  
 F2 - Acquisition Parameters  
 Date\_ 20181011  
 Time 14:23 h  
 INSTRUM spect  
 PROBRD s156457\_0001 i  
 PULPROG zgpg30  
 TD 65536  
 SOLVENT MeOD  
 NS 16  
 DS 2  
 SWH 13019.230 Hz  
 FIDRES 0.366799 Hz  
 AQ 1.7262976 sec  
 RG 26.02  
 DM 81.600 usec  
 DE 18.00 usec  
 TE 298.1 K  
 D1 1.00000000 sec  
 TSD  
 SFO1 600.1837061 MHz  
 NUC1 1H  
 P1 12.00 usec  
 PL1 33.14099884 K  
 F2 - Processing parameters  
 SI 262144  
 SF 600.1801113 MHz  
 WDW EM  
 SSB 0  
 LB 0.30 Hz  
 GB 0  
 PC 1.00

13C\_quick MeOD (C:\NMRData) Petri {1 D4 - 128}

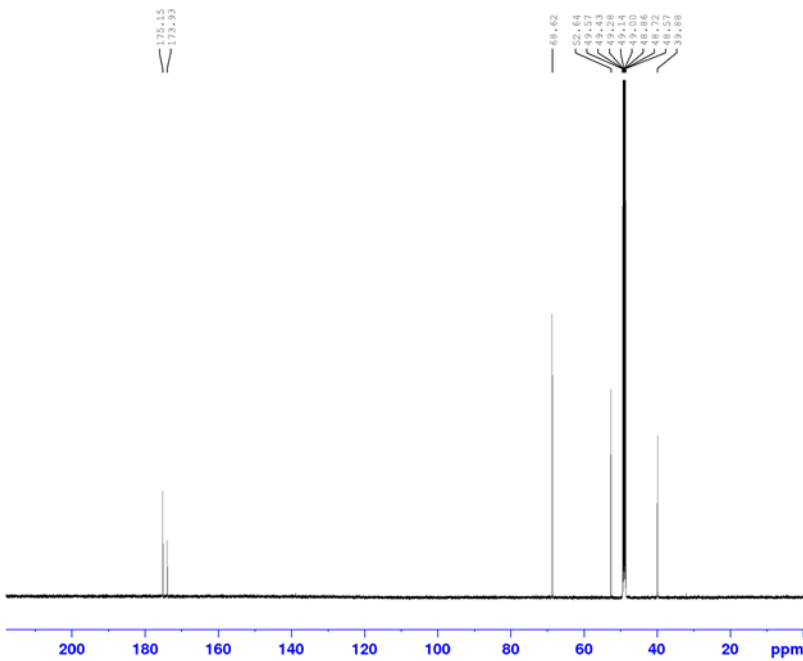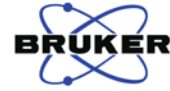

Current Data Parameters  
 NAME F2MS-031018-1 fr. 5-10 akkha  
 EXPNO 1  
 PROCNO 1  
 F2 - Acquisition Parameters  
 Date\_ 20181011  
 Time 16:35 h  
 INSTRUM spect  
 PROBRD s156457\_0001 i  
 PULPROG zgpg30  
 TD 65536  
 SOLVENT MeOD  
 NS 256  
 DS 4  
 SWH 36231.883 Hz  
 FIDRES 1.105709 Hz  
 AQ 0.2043965 sec  
 RG 201.58  
 DM 13.800 usec  
 DE 18.00 usec  
 TE 298.1 K  
 D1 2.00000000 sec  
 TSD  
 SFO1 150.9304726 MHz  
 NUC1 13C  
 P1 10.00 usec  
 PL1 83.4000153 M  
 SFO2 600.1824007 MHz  
 NUC2 1H  
 CPDPRG2 waltz16  
 PCDP2 85.00 usec  
 PLW2 33.14099884 K  
 PLW12 0.74566001 M  
 PLW13 0.37446001 M  
 F2 - Processing parameters  
 SI 131072  
 SF 150.9151702 MHz  
 WDW EM  
 SSB 0  
 LB 1.00 Hz  
 GB 0  
 PC 1.40

**Prepurified wood extract sample containing resin acids and unsaturated fatty acids (signals in rectangle)**

Prepurified wood extract sample

1H\_quick CDCl3 {C:\NMRData} nmr {1 B1 - 102}

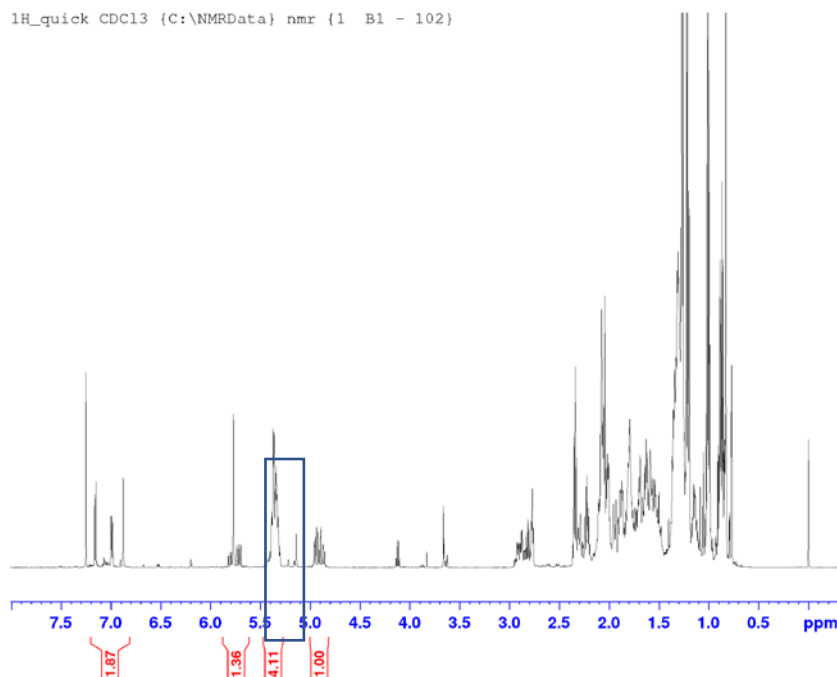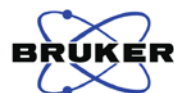

Current Data Parameters  
 NAME VWC-4 FC F3  
 EXPNO 10  
 PROCNO 1

F2 - Acquisition Parameters  
 Date\_ 20160413  
 Time 14.53 h  
 INSTRUM spect  
 PROBHD 2114607\_0215 ( )  
 PULPROG zg30  
 TD 65536  
 SOLVENT CDCl3  
 NS 16  
 DS 2  
 SWH 12019.230 Hz  
 FIDRES 0.183399 Hz  
 AQ 2.7262976 sec  
 RG 19.53  
 DW 41.600 usec  
 DE 6.50 usec  
 TE 298.1 K  
 D1 1.00000000 sec  
 TDO 1  
 SF01 600.1837061 MHz  
 NUC1 1H  
 P1 10.00 usec  
 PLW1 24.28499985 W

F2 - Processing parameters  
 SI 65536  
 SF 600.1800188 MHz  
 WDW EM  
 SSB 0  
 LB 0.30 Hz  
 GB 0  
 PC 1.00

**Ethyl acetate extract after esterification reaction, containing methyl esters of unsaturated fatty acids**

EtOAc extract after esterification.  
 1H\_quick CDCl3 {C:\NMRData} nmr {2 A7 - 249}

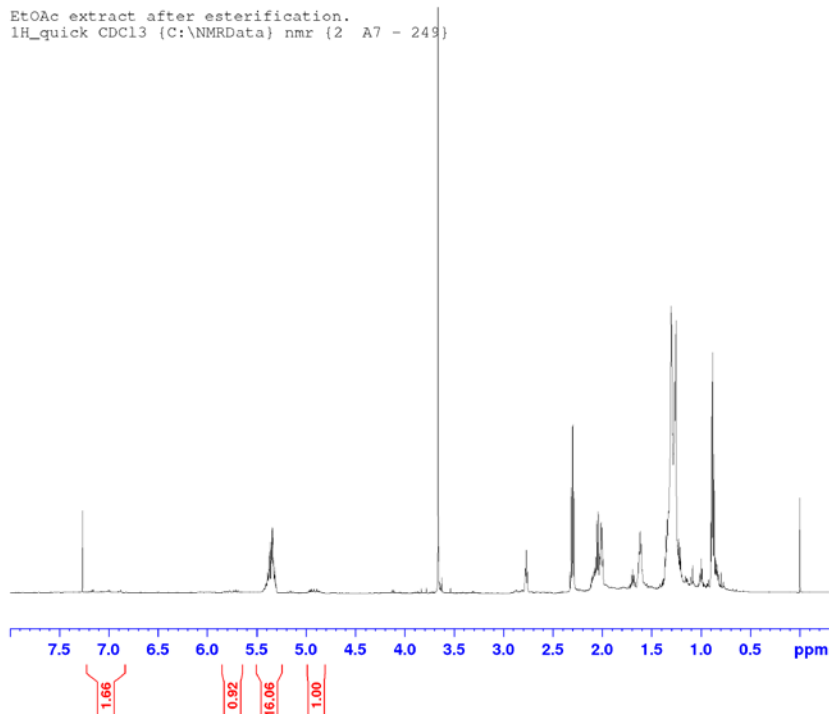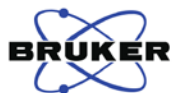

Current Data Parameters  
 NAME VWC-24  
 EXPNO 10  
 PROCNO 1

F2 - Acquisition Parameters  
 Date\_ 20160603  
 Time 12.22 h  
 INSTRUM spect  
 PROBHD 2156457\_0001 ( )  
 PULPROG zg30  
 TD 65536  
 SOLVENT CDCl3  
 NS 16  
 DS 2  
 SWH 12019.230 Hz  
 FIDRES 0.386798 Hz  
 AQ 2.7262976 sec  
 RG 19.53  
 DW 41.600 usec  
 DE 18.00 usec  
 TE 298.1 K  
 D1 1.00000000 sec  
 TDO 1  
 SF01 600.1837061 MHz  
 NUC1 1H  
 P1 12.00 usec  
 PLW1 21.23600006 W

F2 - Processing parameters  
 SI 65536  
 SF 600.1800102 MHz  
 WDW EM  
 SSB 0  
 LB 0.30 Hz  
 GB 0  
 PC 1.00

# Extracted resin acids

EtOAc extracted resin acids  
1H\_quick CDCl3 {C:\NMRData} nmr {2 B7 - 250}

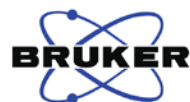

Current Data Parameters  
NAME VWC-24  
EXFNO 20  
PROCNO 1

F2 - Acquisition Parameters  
Date\_ 20160603  
Time 12.29 h  
INSTRUM spect  
PROBHD 2156457\_0001 (zg30)  
PULPROG zg30  
ID 65536  
SOLVENT CDCl3  
NS 16  
DS 2  
SWH 12019.230 Hz  
FIDRES 0.366798 Hz  
AQ 2.7262976 sec  
RG 30.52  
SW 41.600 usec  
DE 18.00 usec  
TE 298.1 K  
D1 1.00000000 sec  
TDO 1  
SFOL 600.1837061 MHz  
NUC1 1H  
P1 12.00 usec  
PLW1 21.23600006 W

F2 - Processing parameters  
SI 65536  
SF 600.1800145 MHz  
WDW EM  
SSB 0  
LB 0.30 Hz  
GB 0  
PC 1.00

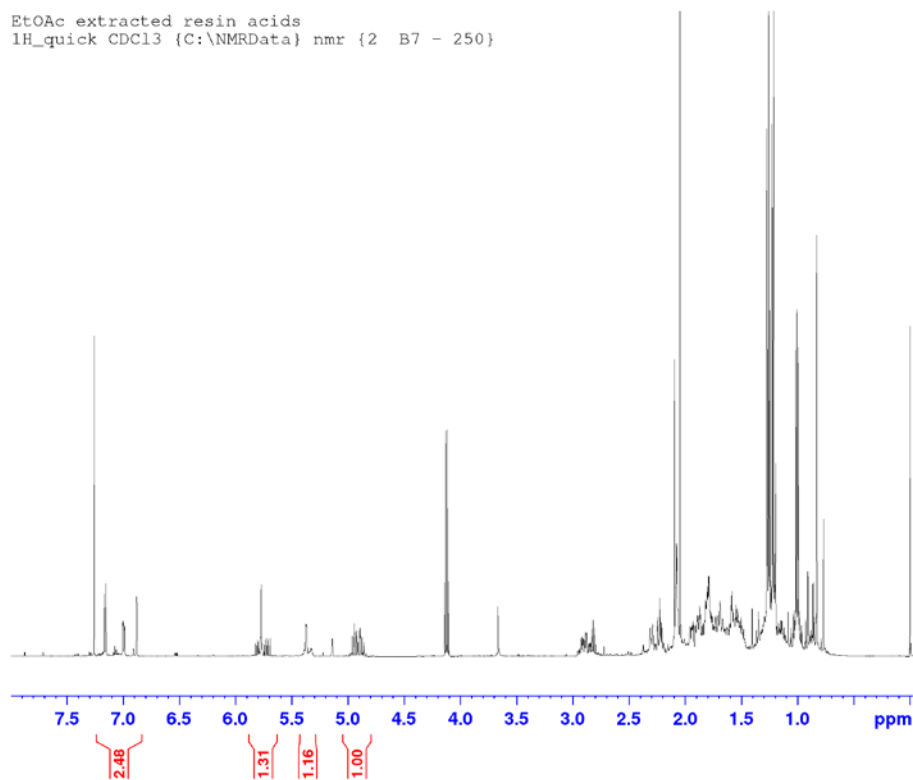

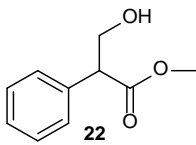

1H\_quick CDCl3 {C:\NMRData} nmr {3 H11 - 388}

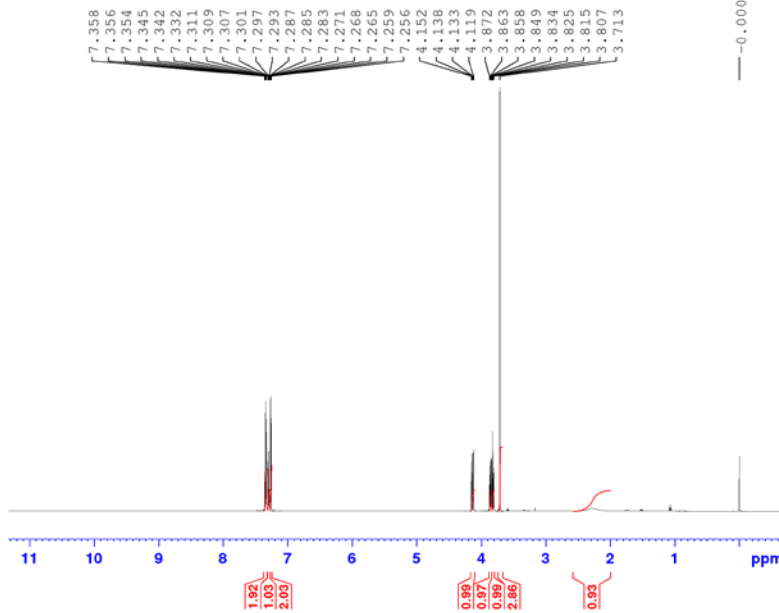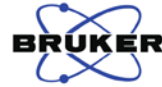

Current Data Parameters  
 NAME PTMS-040118-3  
 EXPNO 10  
 PROCNO 1

F2 - Acquisition Parameters  
 Date\_ 20180105  
 Time 12.01 h  
 INSTRUM spect  
 PROBRD 2156457\_0001 ( )  
 PULPROG zg30  
 TD 65536  
 SOLVENT CDCl3  
 NS 32  
 DS 2  
 SWH 12019.230 Hz  
 FIDRES 0.366798 Hz  
 AQ 2.7262976 sec  
 RG 61.76  
 DW 41.600 usec  
 DE 18.00 usec  
 TE 298.1 K  
 D1 1.0000000 sec  
 TDO 1  
 SFO1 600.1837061 MHz  
 NUCL 1H  
 F1 12.00 usec  
 PLW1 21.23600006 W

F2 - Processing parameters  
 SI 524288  
 SF 600.1800143 MHz  
 MW EM  
 SSB 0  
 LB 0.30 Hz  
 GB 0  
 PC 1.00

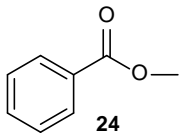

1H\_quick CDCl3 {C:\NMRData} nmr {1 G11 - 187}

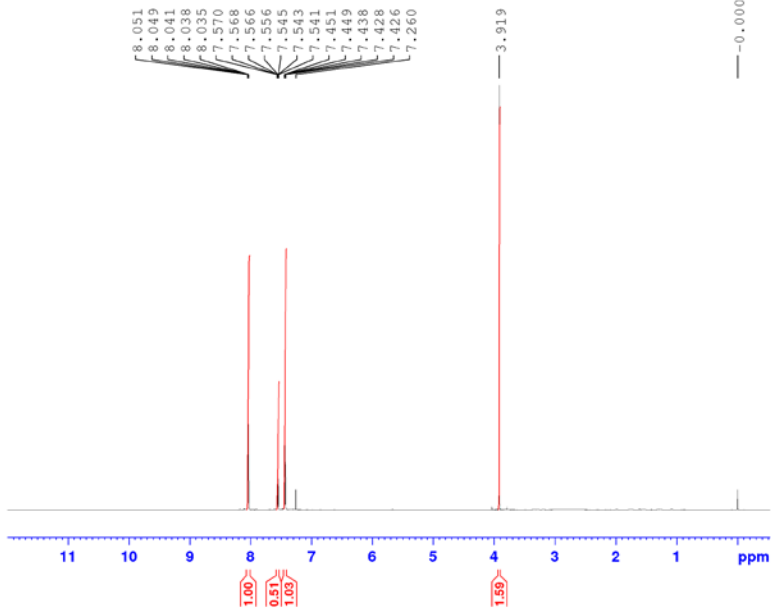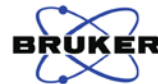

Current Data Parameters  
 NAME PTMS-250118-1  
 EXPNO 10  
 PROCNO 1

F2 - Acquisition Parameters  
 Date\_ 20180130  
 Time 9.54 h  
 INSTRUM spect  
 PROBRD 2156457\_0001 ( )  
 PULPROG zg30  
 TD 65536  
 SOLVENT CDCl3  
 NS 16  
 DS 2  
 SWH 12019.230 Hz  
 FIDRES 0.366798 Hz  
 AQ 2.7262976 sec  
 RG 16.27  
 DW 41.600 usec  
 DE 18.00 usec  
 TE 298.1 K  
 D1 1.0000000 sec  
 TDO 1  
 SFO1 600.1837061 MHz  
 NUCL 1H  
 F1 12.00 usec  
 PLW1 21.23600006 W

F2 - Processing parameters  
 SI 524288  
 SF 600.1800139 MHz  
 MW EM  
 SSB 0  
 LB 0.30 Hz  
 GB 0  
 PC 1.00



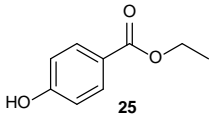

1H\_quick MeOD (C:\NMRData) Petri (1 F12 - 194)

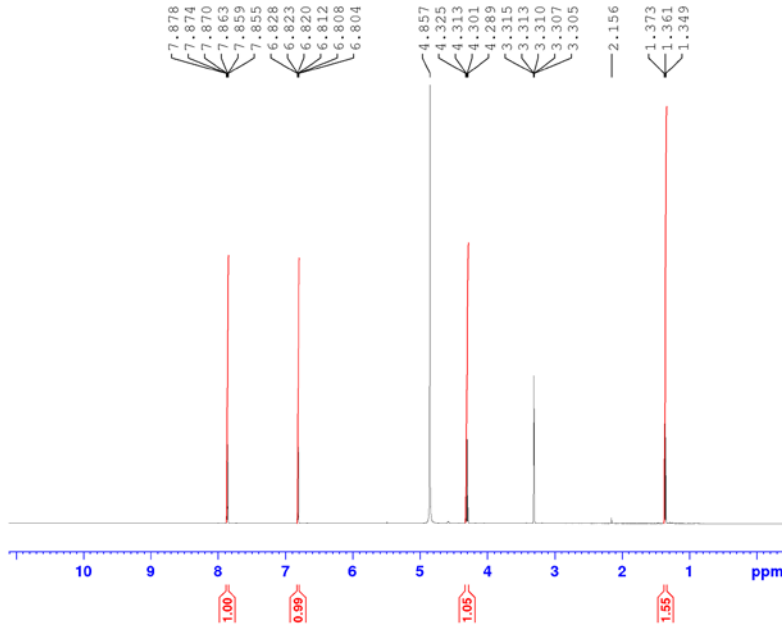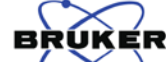

Current Data Parameters  
 NAME PTMS-070918-2  
 EXPNO 10  
 PROCNO 1

F2 - Acquisition Parameters  
 Date\_ 20180910  
 Time 15.35 h  
 INSTRUM spect  
 PROBRD 2156497\_0001 ( )  
 PULPROG zg30  
 ID 65536  
 SOLVENT MeOD  
 NS 16  
 DS 2  
 SWH 12019.230 Hz  
 FIDRES 0.366798 Hz  
 AQ 2.7262976 sec  
 RG 69.21  
 DW 41.600 usec  
 DE 18.00 usec  
 TE 298.1 K  
 DL 1.0000000 sec  
 TDO 1  
 SFO1 600.1837061 MHz  
 NUC1 1H  
 P1 12.00 usec  
 PLM1 33.14098884 W

F2 - Processing parameters  
 SI 262144  
 SF 600.1800114 MHz  
 WDW EM  
 SSB 0  
 LB 0.30 Hz  
 GB 0  
 PC 1.00

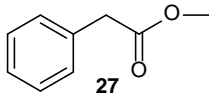

1H\_quick CDCl3 (C:\NMRData) nmr (4 E2 - 413)

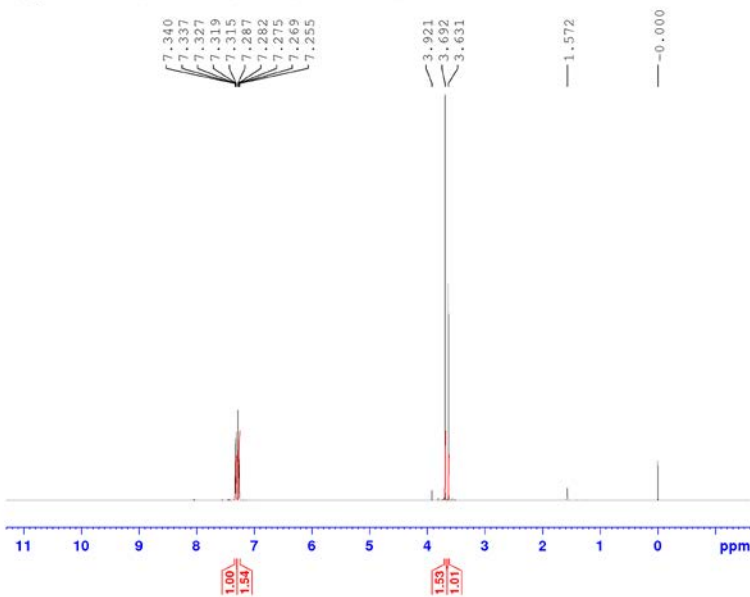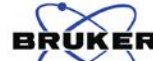

Current Data Parameters  
 NAME PTMS-260617-2c  
 EXPNO 10  
 PROCNO 1

F2 - Acquisition Parameters  
 Date\_ 20170627  
 Time 11.17 h  
 INSTRUM spect  
 PROBRD 2156497\_0001 ( )  
 PULPROG zg30  
 ID 65536  
 SOLVENT CDCl3  
 NS 16  
 DS 2  
 SWH 12019.230 Hz  
 FIDRES 0.366798 Hz  
 AQ 2.7262976 sec  
 RG 61.76  
 DW 41.600 usec  
 DE 18.00 usec  
 TE 298.1 K  
 DL 1.0000000 sec  
 TDO 1  
 SFO1 600.1837061 MHz  
 NUC1 1H  
 P1 12.00 usec  
 PLM1 21.23860006 W

F2 - Processing parameters  
 SI 324288  
 SF 600.1800180 MHz  
 WDW EM  
 SSB 0  
 LB 0.30 Hz  
 GB 0  
 PC 1.00

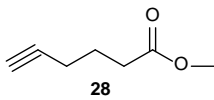

1H\_quick CDC13 [C:\NMRData] Petri (3 A1 - 301)

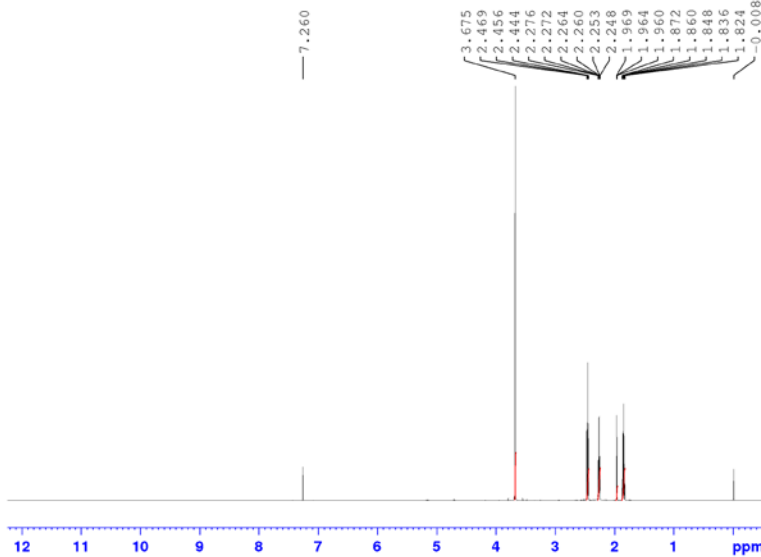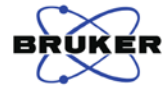

Current Data Parameters  
 NAME FIMS-020119-3  
 EXPNO 10  
 PROCNO 1

F2 - Acquisition Parameters  
 Date\_ 20190103  
 Time 13.13 h  
 INSTRUM spect  
 PROBHD 2156457\_0001 ( )  
 PULPROG zg30  
 TD 65536  
 SFO1 600.1837061 MHz  
 SOLVENT CDCl3  
 NS 16  
 DS 2  
 SWH 12019.230 Hz  
 FIDRES 0.366798 Hz  
 AQ 2.7262976 sec  
 RG 56.02  
 DW 41.600 usec  
 DE 18.00 usec  
 TE 298.1 K  
 D1 1.00000000 sec  
 TDC 1  
 SFO1 600.1837061 MHz  
 NUC1 1H  
 P1 12.00 usec  
 PL1 33.14099884 W  
 FLM1

F2 - Processing parameters  
 SI 262144  
 SF 600.1800154 MHz  
 WDM EM  
 SSB 0  
 LB 0.30 Hz  
 GB 0  
 PC 1.00

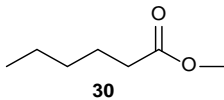

1H\_quick CDC13 [C:\NMRData] Petri (3 H1 - 308)

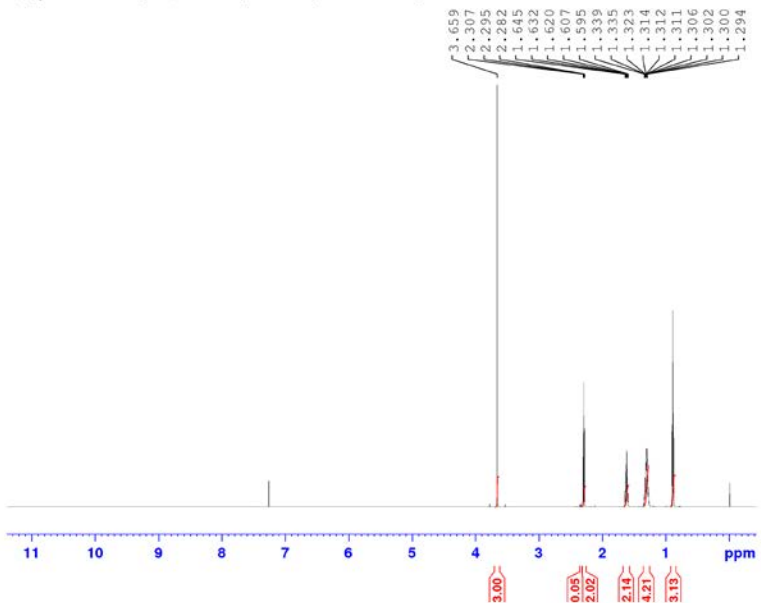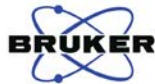

Current Data Parameters  
 NAME FIMS-040119-3  
 EXPNO 10  
 PROCNO 1

F2 - Acquisition Parameters  
 Date\_ 20190104  
 Time 13.32 h  
 INSTRUM spect  
 PROBHD 2156457\_0001 ( )  
 PULPROG zg30  
 TD 65536  
 SFO1 600.1837061 MHz  
 SOLVENT CDCl3  
 NS 16  
 DS 2  
 SWH 12019.230 Hz  
 FIDRES 0.366798 Hz  
 AQ 2.7262976 sec  
 RG 28.13  
 DW 41.600 usec  
 DE 18.00 usec  
 TE 298.1 K  
 D1 1.00000000 sec  
 TDC 1  
 SFO1 600.1837061 MHz  
 NUC1 1H  
 P1 12.00 usec  
 PL1 33.14099884 W  
 FLM1

F2 - Processing parameters  
 SI 262144  
 SF 600.1800151 MHz  
 WDM EM  
 SSB 0  
 LB 0.30 Hz  
 GB 0  
 PC 1.00

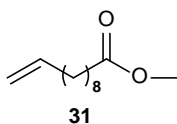

1H\_quick CDCl3 (C:\NMRData) Petri (3 B2 - 310)

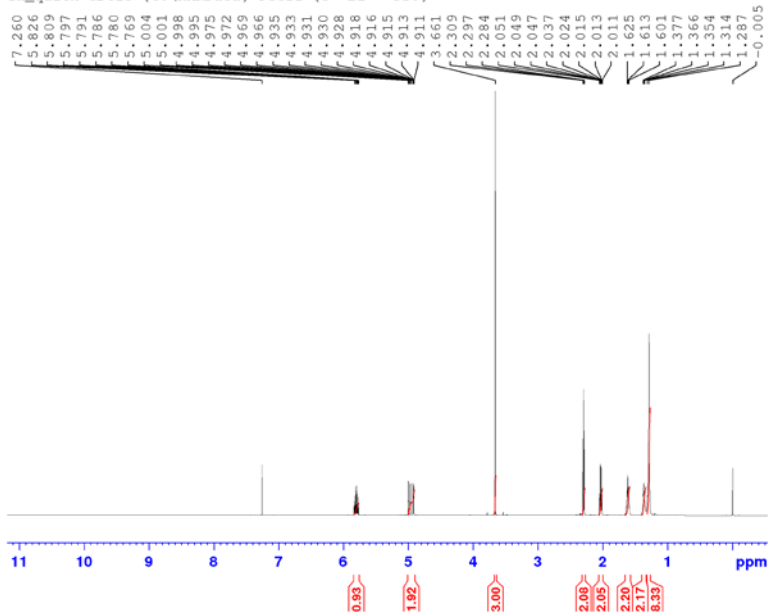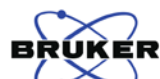

Current Data Parameters  
 NAME PTMS-040119-3  
 EXPNO 11  
 PROCNO 1

F2 - Acquisition Parameters  
 Date\_ 20190104  
 Time 19:47 h  
 INSTRUM spect  
 PROBHD z156457\_0001 ( )  
 PULPROG zg30  
 TD 65536  
 SOLVENT CDCl3  
 NS 16  
 DS 2  
 SWH 12019.230 Hz  
 FIDRES 0.366798 Hz  
 AQ 2.7262976 sec  
 RG 28.13  
 DW 41.600 usec  
 DE 18.00 usec  
 TE 298.1 K  
 D1 1.00000000 sec  
 ID0 1  
 SF01 600.1837061 MHz  
 NUC1 1H  
 P1 12.00 usec  
 PLW1 33.14099884 W

F2 - Processing parameters  
 SI 262144  
 SF 600.1800141 MHz  
 WDW EM  
 SSB 0  
 LB 0.30 Hz  
 GB 0  
 PC 1.00

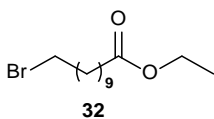

1H\_quick CDCl3 (C:\NMRData) Petri (3 C2 - 311)

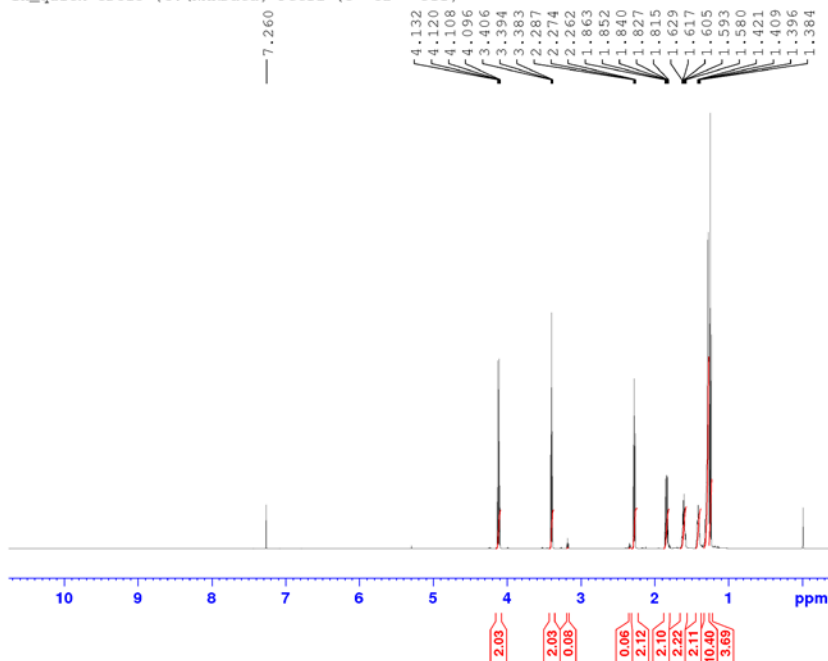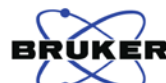

Current Data Parameters  
 NAME PTMS-040119-4  
 EXPNO 10  
 PROCNO 1

F2 - Acquisition Parameters  
 Date\_ 20190107  
 Time 12:08 h  
 INSTRUM spect  
 PROBHD z156457\_0001 ( )  
 PULPROG zg30  
 TD 65536  
 SOLVENT CDCl3  
 NS 16  
 DS 2  
 SWH 12019.230 Hz  
 FIDRES 0.366798 Hz  
 AQ 2.7262976 sec  
 RG 25.38  
 DW 41.600 usec  
 DE 18.00 usec  
 TE 298.1 K  
 D1 1.00000000 sec  
 ID0 1  
 SF01 600.1837061 MHz  
 NUC1 1H  
 P1 12.00 usec  
 PLW1 33.14099884 W

F2 - Processing parameters  
 SI 262144  
 SF 600.1800139 MHz  
 WDW EM  
 SSB 0  
 LB 0.30 Hz  
 GB 0  
 PC 1.00

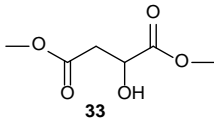

1H\_quick CDCl3 {C:\NMRData} Petri {1 E3 - 121}

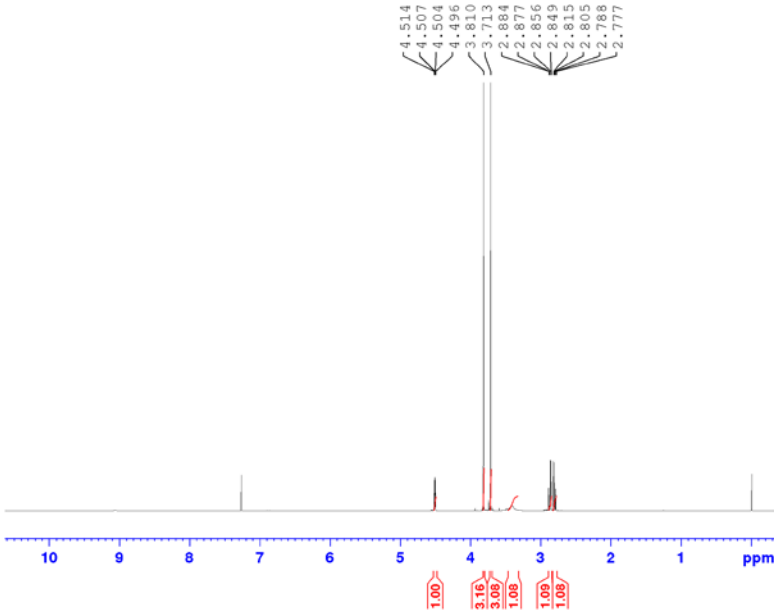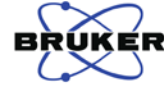

Current Data Parameters  
 NAME PTMS-091018-2  
 EXPNO 10  
 PROCNO 1

F2 - Acquisition Parameters  
 Date\_ 20181011  
 Time 9.55 h  
 INSTRUM spect  
 PROBRD Z156457\_0001 ( )  
 PULPROG zg30  
 ID 65536  
 SOLVENT CDCl3  
 NS 16  
 DS 2  
 SWH 12019.230 Hz  
 FIDRES 0.366798 Hz  
 AQ 2.7262976 sec  
 RG 56.02  
 DW 41.600 usec  
 DE 18.00 usec  
 TE 298.1 K  
 D1 1.0000000 sec  
 TD0 1  
 SFO1 600.1837061 MHz  
 NUC1 1H  
 P1 12.00 usec  
 PLW1 33.14099884 W

F2 - Processing parameters  
 SI 262144  
 SF 600.1800150 MHz  
 MWDW EM  
 SSB 0  
 LB 0.30 Hz  
 GB 0  
 PC 1.00

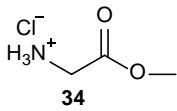

1H\_quick MeOD {C:\NMRData} Petri {1 C10 - 175}

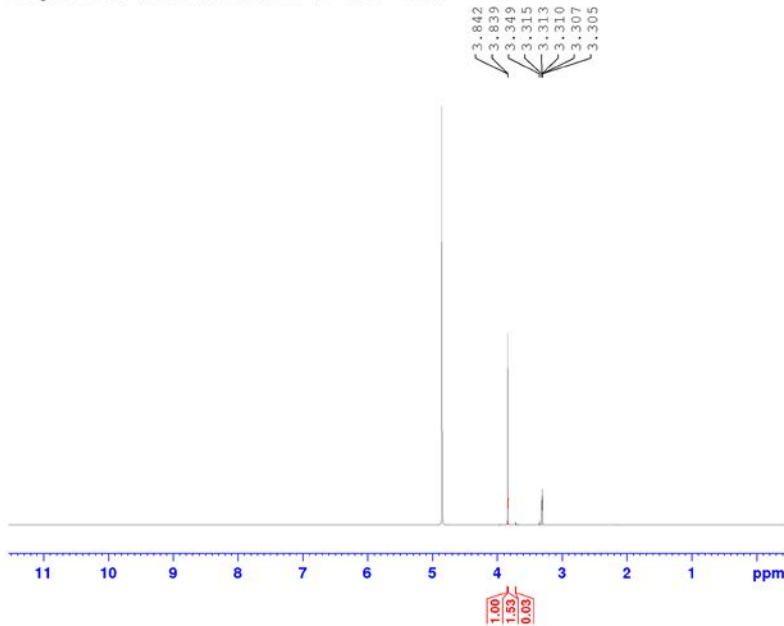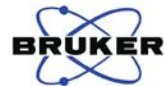

Current Data Parameters  
 NAME PTMS-220119-2a  
 EXPNO 10  
 PROCNO 1

F2 - Acquisition Parameters  
 Date\_ 20190123  
 Time 10.25 h  
 INSTRUM spect  
 PROBRD Z156457\_0001 ( )  
 PULPROG zg30  
 ID 65536  
 SOLVENT MeOD  
 NS 16  
 DS 2  
 SWH 12019.230 Hz  
 FIDRES 0.366798 Hz  
 AQ 2.7262976 sec  
 RG 55.21  
 DW 41.600 usec  
 DE 18.00 usec  
 TE 298.1 K  
 D1 1.0000000 sec  
 TD0 1  
 SFO1 600.1837061 MHz  
 NUC1 1H  
 P1 12.00 usec  
 PLW1 33.14099884 W

F2 - Processing parameters  
 SI 262144  
 SF 600.1800112 MHz  
 MWDW EM  
 SSB 0  
 LB 0.30 Hz  
 GB 0  
 FC 1.00

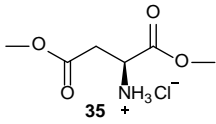

1H\_quick MeOD (C:\NMRData) Petri (1 E3 - 121)

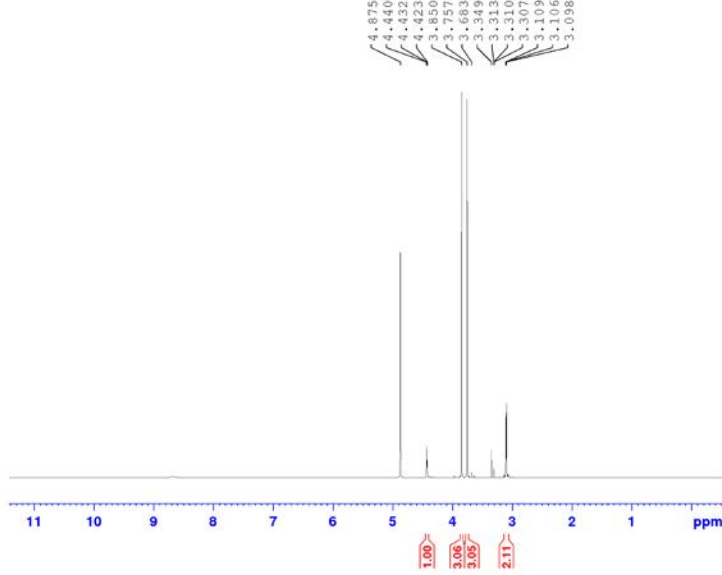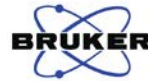

Current Data Parameters  
 NAME FTM-280119-1  
 EXPNO 10  
 PROCNO 1

F2 - Acquisition Parameters  
 Date\_ 20190129  
 Time 18:23 L  
 INSTRUM spect  
 PROBHD 2156457\_0001 f  
 PULPROG zg30  
 ID 65536  
 SOLVENT MeOD  
 NS 16  
 DS 2  
 SWH 12019.230 Hz  
 FIDRES 0.366798 Hz  
 AQ 2.7262976 sec  
 RG 22.18  
 DN 41.600 usec  
 DE 18.00 usec  
 TE 298.1 K  
 D1 1.00000000 sec  
 TDO 1  
 SFO1 600.1837061 MHz  
 NUC1 1H  
 P1 12.00 usec  
 PL1 33.14099884 W

F2 - Processing parameters  
 SI 262144  
 SF 600.1800113 MHz  
 WDW EM  
 SSB 0  
 LB 0.30 Hz  
 GB 0  
 PC 1.00

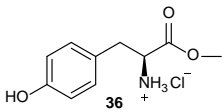

1H\_quick MeOD (C:\NMRData) Petri (1 D11 - 184)

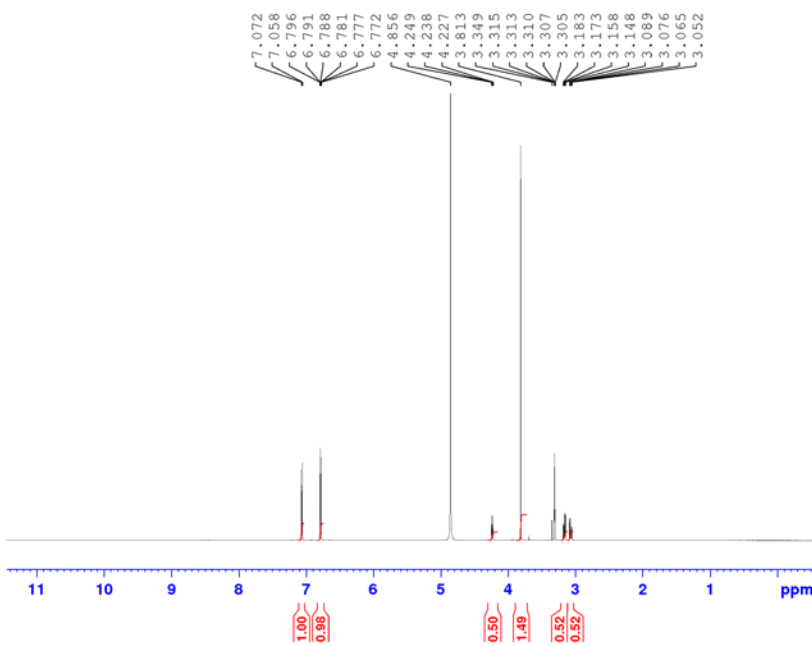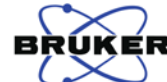

Current Data Parameters  
 NAME PIMS-230119-1  
 EXPNO 10  
 PROCNO 1

F2 - Acquisition Parameters  
 Date\_ 20190124  
 Time 11:10 h  
 INSTRUM spect  
 PROBHD 2156457\_0001 f  
 PULPROG zg30  
 ID 65536  
 SOLVENT MeOD  
 NS 16  
 DS 2  
 SWH 12019.230 Hz  
 FIDRES 0.366798 Hz  
 AQ 2.7262976 sec  
 RG 61.76  
 DW 41.600 usec  
 DE 18.00 usec  
 TE 298.1 K  
 D1 1.00000000 sec  
 TDO 1  
 SFO1 600.1837061 MHz  
 NUC1 1H  
 P1 12.00 usec  
 PL1 33.14099884 W

F2 - Processing parameters  
 SI 262144  
 SF 600.1800116 MHz  
 WDW EM  
 SSB 0  
 LB 0.30 Hz  
 GB 0  
 PC 1.00



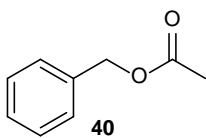

1H\_quick CDCl3 (C:\NMRData) nmr {1 H7 - 156}

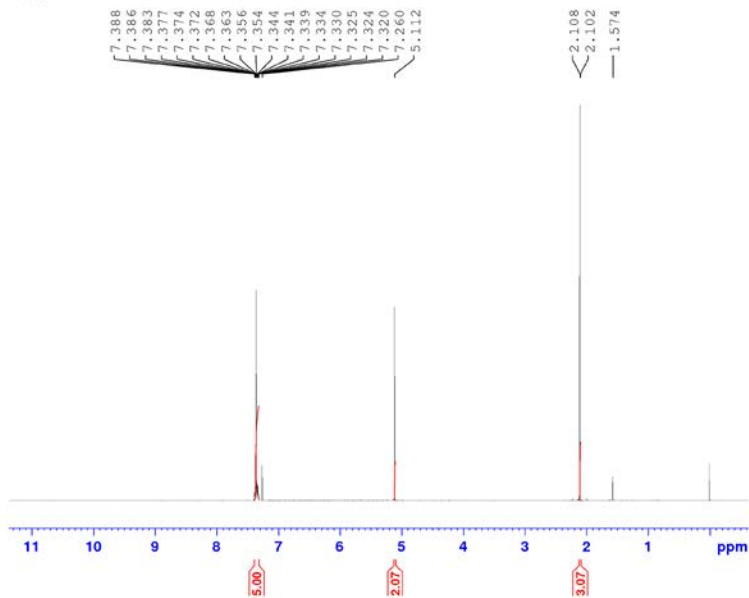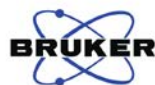

Current Data Parameters  
NAME PIMS-150118-1 cf. 0.34  
EXPNO 10  
PROCNO 1

F2 - Acquisition Parameters  
Date\_ 20180119  
Time 16.40 h  
INSTRUM spect  
PROBHD Z156457\_001 ( )  
PULPROG zg30  
TD 65536  
ID 65536  
SOLVENT CDCl3  
NS 16  
DS 2  
SWH 12019.230 Hz  
FIDRES 0.366798 Hz  
AQ 2.7262976 sec  
RG 69.21  
DM 41.600 usec  
DE 18.00 usec  
TE 298.1 K  
D1 1.00000000 sec  
TDO 1  
SFO1 600.1837061 MHz  
NUC1 1H  
P1 12.00 usec  
PLW1 21.23600006 W

F2 - Processing parameters  
SI 524298  
SF 600.1800150 MHz  
WDW EM  
SSB 0  
LB 0 0.30 Hz  
GB 0  
PC 1.00

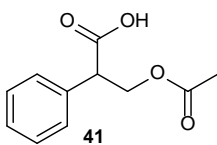

1H\_quick CDCl3 (C:\NMRData) nmr {4 E2 - 413}

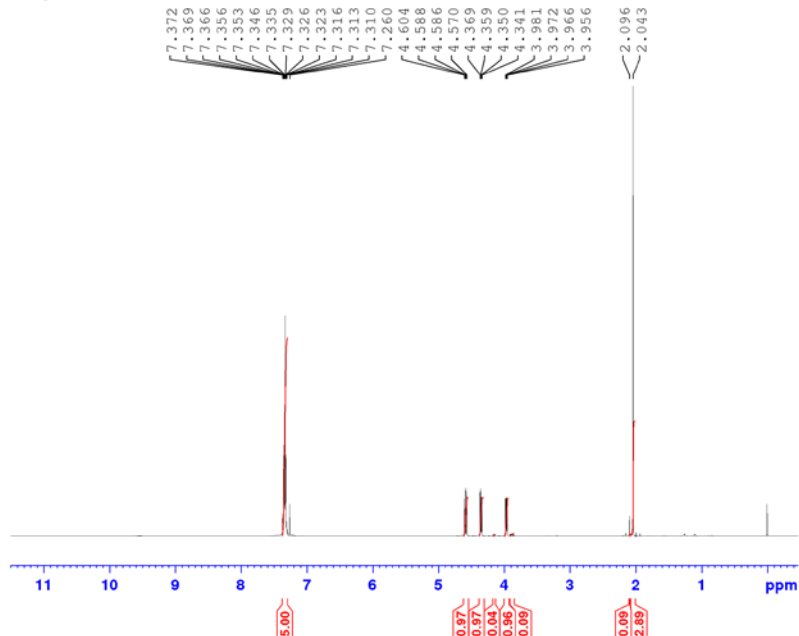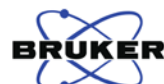

Current Data Parameters  
NAME PIMS-080118-6  
EXPNO 10  
PROCNO 1

F2 - Acquisition Parameters  
Date\_ 20180109  
Time 13.16 h  
INSTRUM spect  
PROBHD Z156457\_001 ( )  
PULPROG zg30  
TD 65536  
ID 65536  
SOLVENT CDCl3  
NS 32  
DS 2  
SWH 12019.230 Hz  
FIDRES 0.366798 Hz  
AQ 2.7262976 sec  
RG 35.27  
DM 41.600 usec  
DE 18.00 usec  
TE 298.1 K  
D1 1.00000000 sec  
TDO 1  
SFO1 600.1837061 MHz  
NUC1 1H  
P1 12.00 usec  
PLW1 21.23600006 W

F2 - Processing parameters  
SI 524288  
SF 600.1800154 MHz  
WDW EM  
SSB 0  
LB 0 0.30 Hz  
GB 0  
PC 1.00

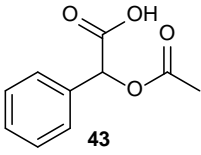

1H\_quick MeOD (C:\NMRData) nmr (4 G5 - 439)

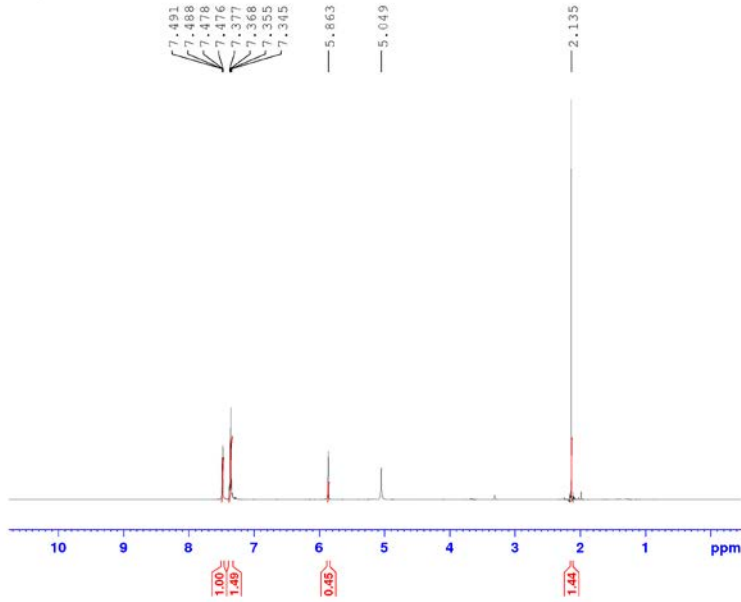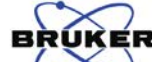

Current Data Parameters  
 NAME F2MS-150218-3 rf. 0.82  
 EXPNO 20  
 PROCNO 1

F2 - Acquisition Parameters  
 Date\_ 20190221  
 Time 10:18 h  
 INSTRUM spect  
 PROBHD Z156457\_0081\_1  
 PULPROG zg30  
 TD 65536  
 SOLVENT MeOD  
 NS 4  
 DS 2  
 SWH 12019.230 Hz  
 FIDRES 0.366798 Hz  
 AQ 2.7262976 sec  
 RG 25.38  
 DW 41.600 usec  
 DE 38.00 usec  
 TE 298.1 K  
 D1 1.00000000 sec  
 TDO 1  
 SFO1 400.1437061 MHz  
 NUC1 1H  
 F1 13.00 usec  
 PL1 21.23620006 W  
 FILM1

F2 - Processing parameters  
 SI 524288  
 SF 600.1800115 MHz  
 MEW 64  
 SSB 0  
 LB 0.30 Hz  
 GB 0  
 PC 1.00

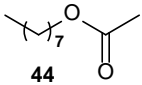

PT/MS-280114-2 cdcl3

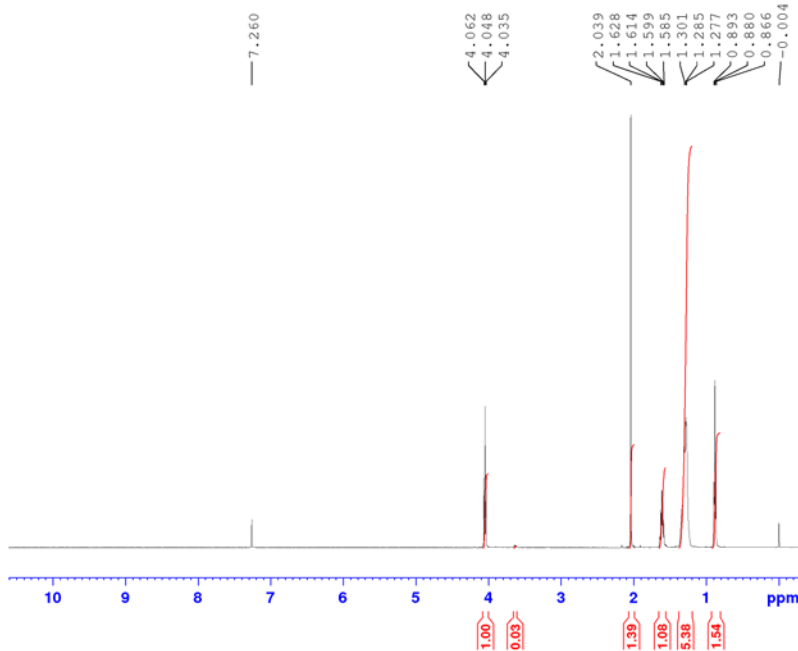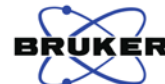

Current Data Parameters  
 NAME MS-280114-2  
 EXPNO 2  
 PROCNO 1

F2 - Acquisition Parameters  
 Date\_ 20140128  
 Time 14:17  
 INSTRUM spect  
 PROBHD 5 mm QNP 1H/1  
 PULPROG zg  
 TD 65536  
 SOLVENT CDCL3  
 NS 4  
 DS 0  
 SWH 10000.000 Hz  
 FIDRES 0.152588 Hz  
 AQ 3.2767999 sec  
 RG 64  
 DW 50.000 usec  
 DE 6.00 usec  
 TE 300.0 K  
 D1 1.50000000 sec  
 TDO 1

----- CHANNEL f1 -----  
 NUC1 1H  
 P1 10.06 usec  
 PL1 -1.00 dB  
 SFO1 500.1340010 MHz

F2 - Processing parameters  
 SI 262144  
 SF 500.1300138 MHz  
 MEW EM  
 SSB 0  
 LB 0.30 Hz  
 GB 0  
 PC 5.00



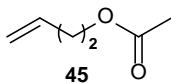

1H\_quick CDCl3 {C:\NMRData} Petri (3 C3 - 319)

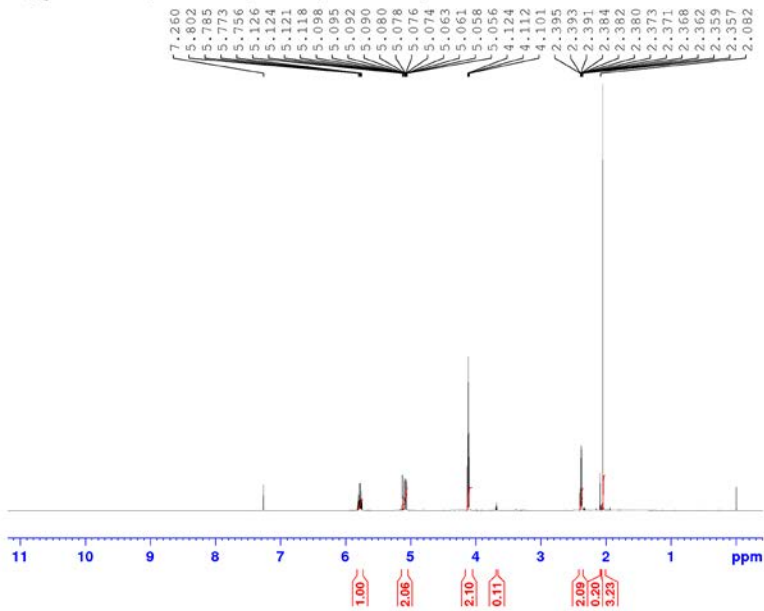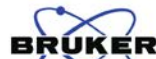

Current Data Parameters  
 NAME PTMS-070115-1b  
 EXPNO 10  
 PROCNO 1

F2 - Acquisition Parameters  
 Date\_ 20190108  
 Time 12.37 h  
 INSTRUM spect  
 PROBHD Z156457\_0001 (1  
 PULPROG zg30  
 ID 65536  
 SOLVENT CDCl3  
 NS 2  
 DS 2  
 SWH 12019.230 Hz  
 FIDRES 0.366798 Hz  
 AQ 2.7262976 sec  
 RG 30.52  
 DW 41.600 usec  
 DE 18.00 usec  
 TE 298.1 K  
 D1 1.00000000 sec  
 TDO 1  
 SFO1 600.1837061 MHz  
 NUC1 1H  
 P1 12.00 usec  
 PLW1 33.14099884 W

F2 - Processing parameters  
 SI 262144  
 SF 600.1800141 MHz  
 WDW EM  
 GB 0  
 LB 0.30 Hz  
 GB 0  
 PC 1.00

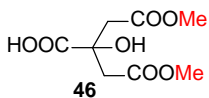

1H\_quick MeOD {C:\NMRData} Petri (3 E1 - 305)

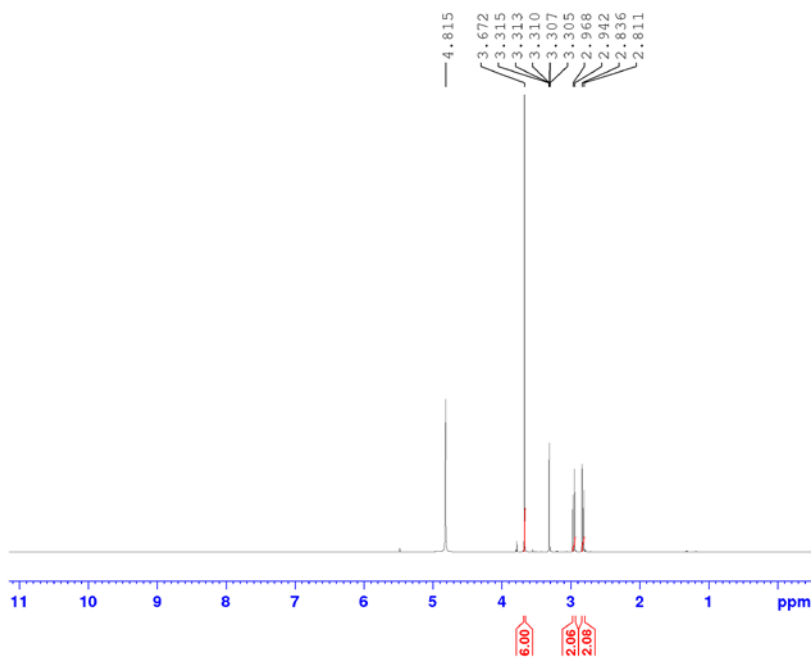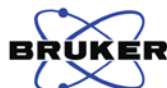

Current Data Parameters  
 NAME PTMS-221015-1b  
 EXPNO 10  
 PROCNO 1

F2 - Acquisition Parameters  
 Date\_ 20190104  
 Time 9.53 h  
 INSTRUM spect  
 PROBHD Z156457\_0001 (1  
 PULPROG zg30  
 ID 65536  
 SOLVENT MeOD  
 NS 16  
 DS 2  
 SWH 12019.230 Hz  
 FIDRES 0.366798 Hz  
 AQ 2.7262976 sec  
 RG 69.21  
 DW 41.600 usec  
 DE 18.00 usec  
 TE 298.1 K  
 D1 1.00000000 sec  
 TDO 1  
 SFO1 600.1837061 MHz  
 NUC1 1H  
 P1 12.00 usec  
 PLW1 33.14099884 W

F2 - Processing parameters  
 SI 262144  
 SF 600.1800112 MHz  
 WDW EM  
 GB 0  
 LB 0.30 Hz  
 GB 0  
 PC 1.00
